# Supplementary material
Source: PubMed Central journal article supplement (PMC4943658)
Supplement: NIHMS726144-supplement-Supp_TableS1-S2.pdf [file NIHMS726144-supplement-Supp_TableS1-S2.pdf]

**Table S1. Brain responses associated with cued threat**

| Region                                                                                        | Voxels | Z    | x   | y   | z  |
|-----------------------------------------------------------------------------------------------|--------|------|-----|-----|----|
| bilateral                                                                                     | 21661  | >8   | -32 | 24  | 4  |
| ACC/MCC/PCC/SMA/dMFC/thalamus/<br>amygdala/aINS/ basal ganglia/<br>right precentral gyrus/MFG |        | 7.77 | 46  | 18  | 0  |
|                                                                                               |        | 7.74 | 22  | 48  | 18 |
| right supramarginal gyrus/IFL                                                                 | 3586   | >8   | 58  | -38 | 38 |
|                                                                                               |        | >8   | 56  | -46 | 36 |
|                                                                                               |        | >8   | 64  | -42 | 32 |
| left supramarginal gyrus/ IFL                                                                 | 2058   | >8   | -56 | -44 | 30 |
|                                                                                               |        | 7.61 | -60 | -38 | 26 |
|                                                                                               |        | 6.53 | -58 | -28 | 22 |
| left MFG                                                                                      | 973    | 6.69 | -32 | 44  | 22 |
|                                                                                               |        | 4.46 | -36 | 32  | 32 |
|                                                                                               |        | 3.42 | -36 | 58  | -4 |
| right superior and middle occipital cortex                                                    | 927    | 6.86 | 20  | -98 | 6  |
|                                                                                               |        | 6.02 | 28  | -96 | 2  |
|                                                                                               |        | 5.62 | 18  | -92 | -2 |
| right precuneus                                                                               | 227    | 5.16 | 16  | -64 | 42 |

---

|                                            |     |      |     |      |     |
|--------------------------------------------|-----|------|-----|------|-----|
|                                            | 452 | 4.58 | -22 | -100 | 4   |
| left middle occipital cortex/lingual gyrus |     | 3.76 | -32 | -96  | 6   |
|                                            |     | 3.7  | -20 | -94  | -14 |

---

MNI coordinates (x,y,z) for peak voxel; Z: Z-values of peak voxels within the significant clusters (voxel threshold  $p < .005$ ; cluster-corrected  $p < .05$ ); ACC: anterior cingulate cortex; MCC: mid cingulate cortex; PCC: posterior cingulate cortex; SMA: supplementary motor area; dmFC: dorsal medial frontal cortex; MFG: middle frontal gyrus; aINS: anterior insula; IFL: inferior parietal lobe

**Table S2. Brain responses associated with contextual threat**

| Region                                                                                        | Voxels | Z    | x   | y   | z  |
|-----------------------------------------------------------------------------------------------|--------|------|-----|-----|----|
| bilateral ACC/MCC/PCC/SMA/dMFC/<br>right precentral gyrus/MFG/amygdala/aINS/<br>basal ganglia | 19002  | 7.44 | 42  | 12  | 42 |
|                                                                                               |        | 7    | 42  | 4   | 52 |
|                                                                                               |        | 6.84 | -4  | 0   | 48 |
| bilateral thalamus/<br>left amygdala/aINS/basal ganglia                                       | 4691   | 7.34 | -32 | 20  | 6  |
|                                                                                               |        | 7.2  | 14  | -4  | 18 |
|                                                                                               |        | 7.04 | 6   | -22 | 8  |
| bilateral supramarginal gyrus/IFL/<br>postcentral gyrus                                       | 4146   | >8   | 58  | -38 | 34 |
|                                                                                               |        | 7.15 | 54  | -48 | 34 |
|                                                                                               |        | 7.11 | 42  | -54 | 44 |
| right precuneus                                                                               | 619    | 7.42 | 10  | -68 | 42 |
|                                                                                               |        | 3.4  | 16  | -48 | 40 |
| left precuneus                                                                                | 607    | 4.9  | -12 | -66 | 34 |
| left MFG                                                                                      | 552    | 6.13 | -32 | 38  | 22 |
|                                                                                               |        | 3.38 | -32 | 52  | 14 |
| left inferior and middle occipital cortex                                                     | 303    | 7.05 | -26 | -98 | -6 |
| right inferior and middle occipital cortex                                                    | 218    | 6.05 | 26  | -98 | -4 |
|                                                                                               |        | 4.56 | 38  | -90 | -6 |

MNI coordinates (x,y,z) for peak voxel; Z: Z-values of peak voxels within the significant clusters (voxel threshold  $p < .005$ ; cluster-corrected  $p < .05$ ); ACC: anterior cingulate cortex; MCC: mid cingulate cortex; PCC: posterior cingulate cortex; SMA: supplementary motor area; dmFC: dorsal medial frontal cortex; MFG: middle frontal gyrus; aINS: anterior insula; IFL: inferior parietal lobe
